# Supplementary material
Source: PubMed Central journal article supplement (PMC6819141)
Supplement: jci-129-130341-s089.pdf [file jci-129-130341-s089.pdf]

**Supplemental Information****Evidence-based recommendations for energy intake in pregnant women with obesity**

Jasper Most, PhD<sup>1</sup>, Marshall St Amant, MD<sup>2</sup>, Daniel Hsia, MD<sup>1</sup>, Abby Altazan, MS<sup>1</sup>, Diana Thomas, PhD<sup>3</sup>, Anne Gilmore, PhD<sup>1</sup>, Porsha Vallo, MPA<sup>1</sup>, Robbie Beyl, PhD<sup>1</sup>, Eric Ravussin, PhD<sup>1</sup>, Leanne Redman, PhD<sup>1</sup>

**Table of Contents**

**Table S1. Metabolic Biomarker Early and Late in Pregnancy of Women with Obesity**

**Table S2. Energy Expenditure and Physical Activity Early and Late in Pregnancy of Women with Obesity**

**Table S3. Dietary Intake Early and Late in Pregnancy of Women with Obesity**

**Table S4. Eating Behavior Constructs Early and Late in Pregnancy of Women with Obesity**

**Table S1. Metabolic Biomarker Early and Late in Pregnancy of Women with Obesity**

|                                            | Early Pregnancy (14.9±0.1 weeks) |                        |                     | Group | Late Pregnancy (35.9±0.1 weeks) |                          |                         | Time   | Group |
|--------------------------------------------|----------------------------------|------------------------|---------------------|-------|---------------------------------|--------------------------|-------------------------|--------|-------|
|                                            | INA<br>(n=10)                    | REC<br>(n=8)           | EXS<br>(n=36)       |       | INA<br>(n=10)                   | REC<br>(n=8)             | EXS<br>(n=36)           |        |       |
| <b>Fasting Plasma Biomarkers</b>           |                                  |                        |                     |       |                                 |                          |                         |        |       |
| Glucose, <i>mg/dL</i>                      | 92±3                             | 90±4                   | 87±1                | 0.21  | 87±4                            | 90±4                     | 85±1                    | 0.03   | 0.27  |
| Insulin, <i>uU/mL</i>                      | 19.1±2.5a                        | 15.4±3.0 <sup>ab</sup> | 12.6±1.1b           | 0.04  | 19.7±3.1                        | 21.8±4.0                 | 17.8±1.3                | <0.001 | 0.18  |
| HOMA-IR, <i>AU</i>                         | 4.4±0.6a                         | 3.4±0.7 <sup>ab</sup>  | 2.7±0.3b            | 0.03  | 4.4±0.7                         | 5.0±1.1                  | 3.8±0.3                 | <0.001 | 0.14  |
| Triiodothyronine/T3, <i>ng/dL</i>          | 212±15 <sup>a</sup>              | 168±7 <sup>b</sup>     | 169±7 <sup>b</sup>  | 0.02  | 191±12                          | 167±11                   | 172±7                   | 0.61   | 0.77  |
| Thyroxine/T4, <i>µg/dL</i>                 | 9.8±0.5                          | 10.4±0.5               | 9.8±0.3             | 0.67  | 10.1±0.4 <sup>a</sup>           | 10.2±0.5 <sup>a,b</sup>  | 9.0±0.3 <sup>b</sup>    | 0.005  | 0.03  |
| Thyroid-Stimulating Hormone, <i>uIU/mL</i> | 1.8±0.3                          | 1.2±0.3                | 1.8±0.2             | 0.27  | 2.0±0.3                         | 1.7±0.5                  | 2.0±0.2                 | 0.05   | 0.96  |
| Leptin, <i>ng/mL</i>                       | 125±19                           | 126±19                 | 112±7               | 0.60  | 116±28 <sup>a</sup>             | 112±14 <sup>a</sup>      | 131±7 <sup>b</sup>      | 0.03   | 0.007 |
| Cholecystokinin, <i>pmol/L</i>             | 271±36                           | 218±26                 | 209±14              | 0.17  | 332±47                          | 385±61                   | 334±19                  | <0.001 | 0.10  |
| Ghrelin, <i>pg/mL</i>                      | 433±23                           | 418±39                 | 453±30              | 0.83  | 373±32                          | 403±38                   | 377±19                  | <0.001 | 0.22  |
| Peptide YY, <i>pg/mL</i>                   | 79±7                             | 81±6                   | 77±4                | 0.93  | 84±7                            | 86±5                     | 79±4                    | 0.19   | 0.79  |
| <b>Urinary Biomarkers</b>                  |                                  |                        |                     |       |                                 |                          |                         |        |       |
| Creatinine, <i>mg/dL</i>                   | 115±11                           | 80±10                  | 85±7                | 0.10  | 96±18                           | 73±7                     | 83±7                    | 0.20   | 0.76  |
| Epinephrine, <i>nmol/L</i>                 | 14.3±2.3                         | 7.5±1.1                | 11.4±1.1            | 0.10  | 12.0±2.3                        | 7.2±0.6                  | 8.3±0.9                 | <0.001 | 0.34  |
| Norepinephrine, <i>nmol/L</i>              | 217±36 <sup>a</sup>              | 116±22 <sup>b</sup>    | 144±15 <sup>b</sup> | 0.04  | 183±38                          | 100±15                   | 113±12                  | 0.006  | 0.29  |
| <b>Respiratory Quotient</b>                |                                  |                        |                     |       |                                 |                          |                         |        |       |
| Sleep                                      | 0.85±0.015                       | 0.85±0.013             | 0.85±0.007          | 0.99  | 0.82±0.009 <sup>a</sup>         | 0.85±0.014 <sup>ab</sup> | 0.86±0.007 <sup>b</sup> | 0.78   | 0.03  |
| Rest                                       | 0.88±0.012                       | 0.89±0.016             | 0.87±0.009          | 0.60  | 0.84±0.012                      | 0.87±0.015               | 0.87±0.007              | 0.22   | 0.07  |

Data are presented as Mean±SEM. According to 2009 Institute of Medicine guidelines, weight gain was classified as inadequate (INA, <170g/week), recommended (REC, ≥170 and <270 g/week), and excessive (EXS, ≥270g/week). HOMA-IR, homeostatic model assessment of insulin resistance, HOMA-IR=glucose[mg/dL]\*insulin[uU/mL]/405. Group present the P-values for the comparisons in early pregnancy, and for the change over time (late pregnancy), with the initial value used as covariate; and Time presents the P-values for the main effect of time, from early to late pregnancy. P≤0.05 is considered statistically significant; shared letters indicate no significant differences between groups in posthoc comparison.

**Table S2. Energy Expenditure and Physical Activity Early and Late in Pregnancy of Women with Obesity**

|                                              | Early Pregnancy (14.9±0.1 weeks) |              |                             | Group | Late Pregnancy (35.9±0.1 weeks) |                       |                             | Time   | Group |
|----------------------------------------------|----------------------------------|--------------|-----------------------------|-------|---------------------------------|-----------------------|-----------------------------|--------|-------|
|                                              | INA<br>(n=10*)                   | REC<br>(n=8) | EXS<br>(n=36 <sup>#</sup> ) |       | INA<br>(n=10*)                  | REC<br>(n=8)          | EXS<br>(n=36 <sup>#</sup> ) |        |       |
| <b>Energy Expenditure</b>                    |                                  |              |                             |       |                                 |                       |                             |        |       |
| Total Daily EE, <i>kcal/d</i>                | 2719±142                         | 2664±119     | 2563±53                     | 0.41  | 2966±156                        | 2984±121              | 2882±54                     | <0.001 | 0.92  |
| Sleeping EE, <i>kcal/d</i>                   | 1907±104                         | 1688±77      | 1648±33                     | 0.009 | 2125±88 <sup>a</sup>            | 2081±102 <sup>b</sup> | 1975±36 <sup>a,b</sup>      | <0.001 | <0.05 |
| Adaptive Thermogenesis, <i>kcal/d</i>        |                                  |              |                             |       | 108±36 <sup>a</sup>             | 248±47 <sup>b</sup>   | 135±14 <sup>a</sup>         | <0.001 | 0.008 |
| <b>Physical Activity</b>                     |                                  |              |                             |       |                                 |                       |                             |        |       |
| Physical Activity Level                      | 1.401±0.053                      | 1.515±0.054  | 1.519±0.030                 | 0.19  | 1.301±0.045                     | 1.449±0.067           | 1.454±0.031                 | 0.004  | 0.20  |
| Activity-related EE, <i>kcal/d</i>           | 504±86                           | 629±74       | 612±40                      | 0.44  | 382±98 <sup>a</sup>             | 604±104 <sup>a</sup>  | 596±48 <sup>a</sup>         | 0.35   | 0.01  |
| Activity-related EE, %TDEE                   | 18.0±2.2                         | 23.4±2.6     | 23.4±1.2                    | 0.13  | 12.4±2.8                        | 20.0±3.2              | 20.3±1.5                    | 0.003  | 0.18  |
| Activity-related EE, Adjusted, <i>kcal/d</i> | 2508±76                          | 2710±82      | 2661±37                     | 0.12  | 2719±71                         | 2840±120              | 2862±49                     | <0.001 | 0.78  |
| Activity-related EE, Residual, <i>kcal/d</i> |                                  |              |                             |       | -61±99                          | -143±118              | -71±45                      | 0.06   | 0.79  |
| Mean Amplitude Deviation, <i>mg</i>          | 46.6±3.1                         | 56.4±2.3     | 53.8±1.7                    | 0.07  | 41.4±4.0                        | 52.9±3.8              | 47.5±1.9                    | 0.004  | 0.40  |

Data are presented as Mean±SEM. According to 2009 Institute of Medicine guidelines, weight gain was classified as inadequate (INA, <170g/week), recommended (REC, ≥170 and <270 g/week), and excessive (EXS, ≥270g/week). EE, energy expenditure, TDEE, total daily EE. Adaptive thermogenesis describes the increase in sleeping EE that is not explained by the increase in body weight, and was calculated as measured minus adjusted energy expenditure minus residual sleeping energy expenditure early in pregnancy; Physical Activity Level=TDEE/RMR; Activity-related EE, kcal/d = 0.9TDEE-RMR; Activity-related EE, %TDEE = Activity-related EE [kcal/d]/TDEE; Adjusted and Residual Activity EE were calculated as function of TDEE=a+b\*SleepEE; Activity-related EE, residual = TDEE, measured - TDEE, adjusted - Activity-related EE, residual (early pregnancy). Group present the P-values for the comparisons in early pregnancy, and for the change over time (late pregnancy), with the initial value used as covariate; and Time presents the P-values for the main effect of time, from early to late pregnancy. P≤0.05 is considered statistically significant; shared letters indicate no significant differences between groups in posthoc comparison. \*Sleeping EE, adaptive thermogenesis and physical activity was only available in 9 patients; <sup>#</sup>Sleeping EE, adaptive thermogenesis and physical activity was only available in 33 patients.

**Table S3. Dietary Intake Early and Late in Pregnancy of Women with Obesity**

|                                           | Early Pregnancy (14.9±0.1 weeks) |              |               | Group | Late Pregnancy (35.9±0.1 weeks) |              |               | Time   | Group |
|-------------------------------------------|----------------------------------|--------------|---------------|-------|---------------------------------|--------------|---------------|--------|-------|
|                                           | INA<br>(n=5)                     | REC<br>(n=5) | EXS<br>(n=29) |       | INA<br>(n=5)                    | REC<br>(n=5) | EXS<br>(n=29) |        |       |
| Energy Intake, Self-report, <i>kcal/d</i> | 2052±118                         | 2319±248     | 2114±54       | 0.61  | 2333±131                        | 2352±170     | 2233±72       | 0.05   | 0.77  |
| Reporting Accuracy, % of TDEE             | 84.3±7.2                         | 86.1±5.3     | 83.9±1.6      | 0.88  | 89.4±5.4                        | 80.3±2.8     | 78.4±2.2      | 0.03   | 0.14  |
| Protein, % of Energy Intake               | 18.9±5.4                         | 16.3±1.6     | 15.3±0.7      | 0.19  | 13.7±1.4                        | 16.1±1.7     | 15.3±0.8      | 0.28   | 0.41  |
| Fat, % of Energy Intake                   | 34.0±2.5                         | 38.0±2.6     | 38.1±0.8      | 0.20  | 34.6±2.5                        | 39.6±2.7     | 38.3±1.1      | 0.69   | 0.35  |
| Carbohydrate, % of Energy Intake          | 48.2±5.5                         | 46.6±3.8     | 47.6±1.3      | 0.57  | 52.7±3.7                        | 44.9±3.6     | 47.4±1.6      | 0.87   | 0.36  |
| <b>Healthy Eating Index 2015</b>          |                                  |              |               |       |                                 |              |               |        |       |
| Healthy Eating Index, <i>AU</i>           | 42.9±4.9                         | 47.4±4.0     | 47.1±1.9      | 0.67  | 45.3±4.9                        | 43.4±2.3     | 47.2±1.6      | 0.95   | 0.53  |
| Total Fruits, <i>AU</i>                   | 1.4±0.6                          | 2.0±0.6      | 1.8±0.3       | 0.60  | 1.9±0.9                         | 1.2±0.4      | 1.5±0.3       | 0.22   | 0.55  |
| Whole Fruits, <i>AU</i>                   | 1.3±0.8                          | 2.0±0.5      | 1.6±0.3       | 0.49  | 1.6±0.9                         | 2.1±0.7      | 1.5±0.3       | 0.86   | 0.82  |
| Total Vegetables, <i>AU</i>               | 3.0±0.6                          | 3.3±0.3      | 3.1±0.2       | 0.19  | 2.4±0.6                         | 3.1±0.3      | 2.3±0.2       | <0.001 | 0.30  |
| Greens & Beans, <i>AU</i>                 | 1.4±0.9                          | 2.0±0.6      | 2.0±0.3       | 0.33  | 0.9±0.6                         | 1.2±0.7      | 1.5±0.3       | 0.13   | 0.76  |
| Whole Grains, <i>AU</i>                   | 2.6±1.4                          | 0.4±0.2      | 1.9±0.4       | 0.25  | 2.8±1.4                         | 0.4±0.3      | 1.5±0.4       | 0.42   | 0.35  |
| Refined Grains, <i>AU</i>                 | 5.4±1.6                          | 5.2±0.8      | 5.7±0.5       | 0.48  | 4.9±0.7                         | 4.4±1.2      | 5.6±0.5       | 0.62   | 0.61  |
| Dairy, <i>AU</i>                          | 5.6±0.8                          | 4.7±0.7      | 5.7±0.5       | 0.61  | 5.0±0.5                         | 4.7±0.7      | 5.3±0.3       | 0.15   | 0.80  |
| Total Protein Foods, <i>AU</i>            | 3.9±0.5                          | 4.5±0.1      | 4.2±0.1       | 0.32  | 4.1±0.3                         | 5.0±0.03     | 4.1±0.1       | 0.91   | 0.09  |
| Seafood & Plant Protein, <i>AU</i>        | 0.6±0.3                          | 2.0±0.8      | 2.2±0.3       | 0.23  | 2.2±0.8                         | 1.9±0.8      | 2.4±0.3       | 0.07   | 0.51  |
| Sodium, <i>AU</i>                         | 3.2±1.6                          | 3.2±0.8      | 3.4±0.4       | 0.58  | 4.1±0.5                         | 3.4±1.1      | 5.1±0.5       | 0.002  | 0.40  |
| Fatty Acids, <i>AU</i>                    | 3.3±1.2                          | 5.9±1.3      | 4.6±0.5       | 0.22  | 4.5±0.7                         | 5.3±0.9      | 5.6±0.4       | 0.04   | 0.63  |
| Saturated Fats, <i>AU</i>                 | 4.7±0.6                          | 5.3±0.9      | 4.4±0.4       | 1.00  | 5.7±1.3                         | 4.3±1.1      | 5.0±0.4       | 0.25   | 0.67  |
| Added Sugars, <i>AU</i>                   | 6.5±1.2                          | 6.9±1.6      | 6.4±0.6       | 0.60  | 5.1±0.9                         | 6.5±1.4      | 5.8±0.5       | 0.12   | 0.69  |

Data are presented as Mean±SEM. According to 2009 Institute of Medicine guidelines, weight gain was classified as inadequate (INA, <170g/week), recommended (REC, ≥170 and <270 g/week), and excessive (EXS, ≥270g/week). Diet Intake was assessed by food photography, simultaneous with the doubly-labeled water period. Reporting accuracy was calculated as ratio of self-reported energy intake and total daily energy expenditure (TDEE) during that period, after days of obvious underreporting were excluded. Prior to analysis, days on which self-reported energy intake was less than 60% of TDEE were excluded. Group present the P-values for the comparisons in early pregnancy, and for the change over time (late pregnancy), with the initial value used as covariate; and Time presents the P-values for the main effect of time, from early to late pregnancy.

**Table S4. Eating Behavior Constructs Early and Late in Pregnancy of Women with Obesity**

|                                  | Early Pregnancy (14.9±0.1 weeks) |              |               | Group | Late Pregnancy (35.9±0.1 weeks) |              |               | Time  | Group |
|----------------------------------|----------------------------------|--------------|---------------|-------|---------------------------------|--------------|---------------|-------|-------|
|                                  | INA<br>(n=10)                    | REC<br>(n=8) | EXS<br>(n=36) |       | INA<br>(n=10)                   | REC<br>(n=8) | EXS<br>(n=36) |       |       |
| <b>Nausea and Vomiting</b>       |                                  |              |               |       |                                 |              |               |       |       |
| PUQE Summary Score, <i>AU</i>    | 6.3±0.4                          | 6.1±0.6      | 6.1±0.4       | 0.97  |                                 |              |               |       |       |
| <b>Eating Inventory</b>          |                                  |              |               |       |                                 |              |               |       |       |
| Cognitive Restraint, <i>AU</i>   | 7.7±1.4                          | 6.4±1.7      | 8.8±0.8       | 0.41  | 7.8±1.2                         | 7.6±1.8      | 8.9±0.9       | 0.53  | 0.79  |
| Disinhibition, <i>AU</i>         | 6.9±1.4                          | 5.0±0.5      | 5.7±0.6       | 0.48  | 5.8±1.5                         | 5.5±1.1      | 5.6±0.6       | 0.41  | 0.09  |
| Hunger, <i>AU</i>                | 4.8±1.1                          | 4.6±0.7      | 4.4±0.4       | 0.88  | 4.7±1.1                         | 4.0±0.7      | 5.1±0.5       | 0.27  | 0.40  |
| <b>Food Craving Inventory</b>    |                                  |              |               |       |                                 |              |               |       |       |
| Fat, <i>AU</i>                   | 2.0±0.2                          | 1.9±0.2      | 1.8±0.1       | 0.46  | 2.2±0.3                         | 2.0±0.2      | 1.9±0.1       | 0.12  | 0.81  |
| Sweets, <i>AU</i>                | 2.2±0.2                          | 2.1±0.2      | 2.0±0.1       | 0.61  | 2.4±0.2                         | 2.5±0.3      | 2.4±0.1       | 0.001 | 0.67  |
| Carbohydrates, <i>AU</i>         | 2.3±0.2                          | 2.4±0.2      | 2.1±0.1       | 0.36  | 2.2±0.2                         | 2.6±0.2      | 2.1±0.1       | 0.90  | 0.35  |
| Fast Food Fat, <i>AU</i>         | 2.9±0.2                          | 2.5±0.4      | 2.5±0.1       | 0.39  | 3.2±0.2                         | 2.6±0.3      | 2.7±0.1       | 0.01  | 0.56  |
| Fruits and Vegetables, <i>AU</i> | 2.6±0.2                          | 2.4±0.3      | 2.5±0.2       | 0.83  | 2.3±0.2                         | 2.7±0.2      | 2.5±0.1       | 0.68  | 0.20  |
| Total Score, <i>AU</i>           | 2.3±0.1                          | 2.2±0.2      | 2.1±0.1       | 0.43  | 2.4±0.2                         | 2.5±0.2      | 2.3±0.1       | 0.03  | 0.63  |
| <b>Mindful Eating</b>            |                                  |              |               |       |                                 |              |               |       |       |
| Awareness, <i>AU</i>             | 2.6±0.1                          | 2.5±0.2      | 2.5±0.1       | 0.95  | 2.4±0.2                         | 2.5±0.1      | 2.6±0.1       | 1.00  | 0.34  |
| Distraction, <i>AU</i>           | 3.3±0.2                          | 3.3±0.1      | 2.9±0.1       | 0.22  | 3.1±0.2                         | 3.2±0.1      | 3.1±0.1       | 0.22  | 0.59  |
| Disinhibition, <i>AU</i>         | 3.1±0.2                          | 3.2±0.1      | 3.1±0.1       | 0.96  | 3.2±0.2                         | 3.2±0.2      | 3.1±0.1       | 0.33  | 0.64  |
| Emotional Response, <i>AU</i>    | 3.1±0.2                          | 3.3±0.1      | 3.3±0.1       | 0.63  | 3.3±0.3                         | 3.5±0.1      | 3.3±0.1       | 0.27  | 0.59  |
| External Cues, <i>AU</i>         | 2.3±0.1                          | 2.3±0.2      | 2.5±0.1       | 0.54  | 2.3±0.2                         | 2.3±0.1      | 2.5±0.1       | 0.63  | 0.97  |
| Summary Score, <i>AU</i>         | 2.9±0.1                          | 2.9±0.1      | 2.9±0.1       | 0.95  | 2.9±0.1                         | 2.9±0.1      | 2.9±0.1       | 0.23  | 0.75  |

Data are presented as Mean±SEM. According to 2009 Institute of Medicine guidelines, weight gain was classified as inadequate (INA, <170g/week), recommended (REC, ≥170 and <270 g/week), and excessive (EXS, ≥270g/week). Nausea and Vomiting were assessed at the Screening Visit, while other questionnaires were completed after dinner during the overnight stays early and late in pregnancy. Group present the P-values for the comparisons in early pregnancy, and for the change over time (late pregnancy), with the initial value used as covariate; and Time presents the P-values for the main effect of time, from early to late pregnancy.

STROBE Statement—Checklist of items that should be included in reports of *cohort studies*

|                              | Item No | Recommendation                                                                                                                                                                                                    | Page No    |
|------------------------------|---------|-------------------------------------------------------------------------------------------------------------------------------------------------------------------------------------------------------------------|------------|
| <b>Title and abstract</b>    | 1       | (a) Indicate the study's design with a commonly used term in the title or the abstract                                                                                                                            | 1          |
|                              |         | (b) Provide in the abstract an informative and balanced summary of what was done and what was found                                                                                                               | 2          |
| <b>Introduction</b>          |         |                                                                                                                                                                                                                   |            |
| Background/rationale         | 2       | Explain the scientific background and rationale for the investigation being reported                                                                                                                              | 4-5        |
| Objectives                   | 3       | State specific objectives, including any prespecified hypotheses                                                                                                                                                  | 5          |
| <b>Methods</b>               |         |                                                                                                                                                                                                                   |            |
| Study design                 | 4       | Present key elements of study design early in the paper                                                                                                                                                           | 6          |
| Setting                      | 5       | Describe the setting, locations, and relevant dates, including periods of recruitment, exposure, follow-up, and data collection                                                                                   | 14         |
| Participants                 | 6       | (a) Give the eligibility criteria, and the sources and methods of selection of participants. Describe methods of follow-up<br>(b) For matched studies, give matching criteria and number of exposed and unexposed | 14-15      |
| Variables                    | 7       | Clearly define all outcomes, exposures, predictors, potential confounders, and effect modifiers. Give diagnostic criteria, if applicable                                                                          | 14-17      |
| Data sources/<br>measurement | 8*      | For each variable of interest, give sources of data and details of methods of assessment (measurement). Describe comparability of assessment methods if there is more than one group                              | 14-17      |
| Bias                         | 9       | Describe any efforts to address potential sources of bias                                                                                                                                                         | 17         |
| Study size                   | 10      | Explain how the study size was arrived at                                                                                                                                                                         | 17         |
| Quantitative variables       | 11      | Explain how quantitative variables were handled in the analyses. If applicable, describe which groupings were chosen and why                                                                                      | 17         |
| Statistical methods          | 12      | (a) Describe all statistical methods, including those used to control for confounding                                                                                                                             | 17         |
|                              |         | (b) Describe any methods used to examine subgroups and interactions                                                                                                                                               | 17         |
|                              |         | (c) Explain how missing data were addressed                                                                                                                                                                       | NA         |
|                              |         | (d) If applicable, explain how loss to follow-up was addressed                                                                                                                                                    | 17, 6      |
|                              |         | (e) Describe any sensitivity analyses                                                                                                                                                                             | 6, 18      |
| <b>Results</b>               |         |                                                                                                                                                                                                                   |            |
| Participants                 | 13*     | (a) Report numbers of individuals at each stage of study—eg numbers potentially eligible, examined for eligibility, confirmed eligible, included in the study, completing follow-up, and analysed                 | 6          |
|                              |         | (b) Give reasons for non-participation at each stage                                                                                                                                                              | Figure S1  |
|                              |         | (c) Consider use of a flow diagram                                                                                                                                                                                | Figure S1  |
| Descriptive data             | 14*     | (a) Give characteristics of study participants (eg demographic, clinical, social) and information on exposures and potential confounders                                                                          | 6, Table 1 |
|                              |         | (b) Indicate number of participants with missing data for each variable of interest                                                                                                                               | NA         |
|                              |         | (c) Summarise follow-up time (eg, average and total amount)                                                                                                                                                       | NA         |
| Outcome data                 | 15*     | Report numbers of outcome events or summary measures over time                                                                                                                                                    | Table 1    |

|                          |    |                                                                                                                                                                                                                                                                                                                                                                                                               |  |
|--------------------------|----|---------------------------------------------------------------------------------------------------------------------------------------------------------------------------------------------------------------------------------------------------------------------------------------------------------------------------------------------------------------------------------------------------------------|--|
| Main results             | 16 | (a) Give unadjusted estimates and, if applicable, confounder-adjusted estimates and their precision (eg, 95% confidence interval). Make clear which confounders were adjusted for and why they were included<br>(b) Report category boundaries when continuous variables were categorized<br>(c) If relevant, consider translating estimates of relative risk into absolute risk for a meaningful time period |  |
| Other analyses           | 17 | Report other analyses done—eg analyses of subgroups and interactions, and sensitivity analyses                                                                                                                                                                                                                                                                                                                |  |
| <b>Discussion</b>        |    |                                                                                                                                                                                                                                                                                                                                                                                                               |  |
| Key results              | 18 | Summarise key results with reference to study objectives                                                                                                                                                                                                                                                                                                                                                      |  |
| Limitations              | 19 | Discuss limitations of the study, taking into account sources of potential bias or imprecision. Discuss both direction and magnitude of any potential bias                                                                                                                                                                                                                                                    |  |
| Interpretation           | 20 | Give a cautious overall interpretation of results considering objectives, limitations, multiplicity of analyses, results from similar studies, and other relevant evidence                                                                                                                                                                                                                                    |  |
| Generalisability         | 21 | Discuss the generalisability (external validity) of the study results                                                                                                                                                                                                                                                                                                                                         |  |
| <b>Other information</b> |    |                                                                                                                                                                                                                                                                                                                                                                                                               |  |
| Funding                  | 22 | Give the source of funding and the role of the funders for the present study and, if applicable, for the original study on which the present article is based                                                                                                                                                                                                                                                 |  |

\*Give information separately for exposed and unexposed groups.

**Note:** An Explanation and Elaboration article discusses each checklist item and gives methodological background and published examples of transparent reporting. The STROBE checklist is best used in conjunction with this article (freely available on the Web sites of PLoS Medicine at <http://www.plosmedicine.org/>, Annals of Internal Medicine at <http://www.annals.org/>, and Epidemiology at <http://www.epidem.com/>). Information on the STROBE Initiative is available at <http://www.strobe-statement.org>.
