# Supplementary material
Source: PubMed Central journal article supplement (PMC6819141)
Supplement: jci-129-130341-s090.pdf [file jci-129-130341-s090.pdf]

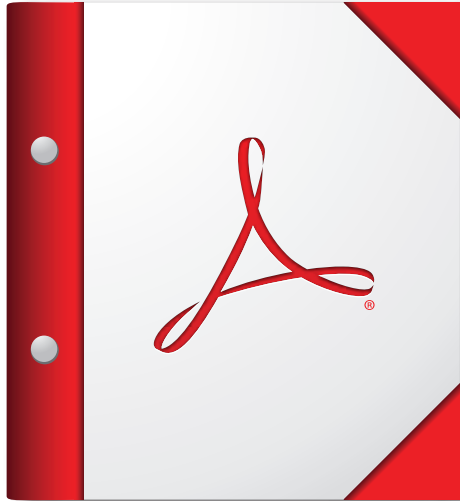

**For the best experience, open this PDF portfolio in  
Acrobat X or Adobe Reader X, or later.**

[Get Adobe Reader Now!](#)
